# Supplementary material for: Myocardial architecture and patient variability in clinical patterns of atrial fibrillation
Source: PubMed Central journal article supplement (PMC5068559; doi:10.1103/physreve.94.042401), 2016-10-04

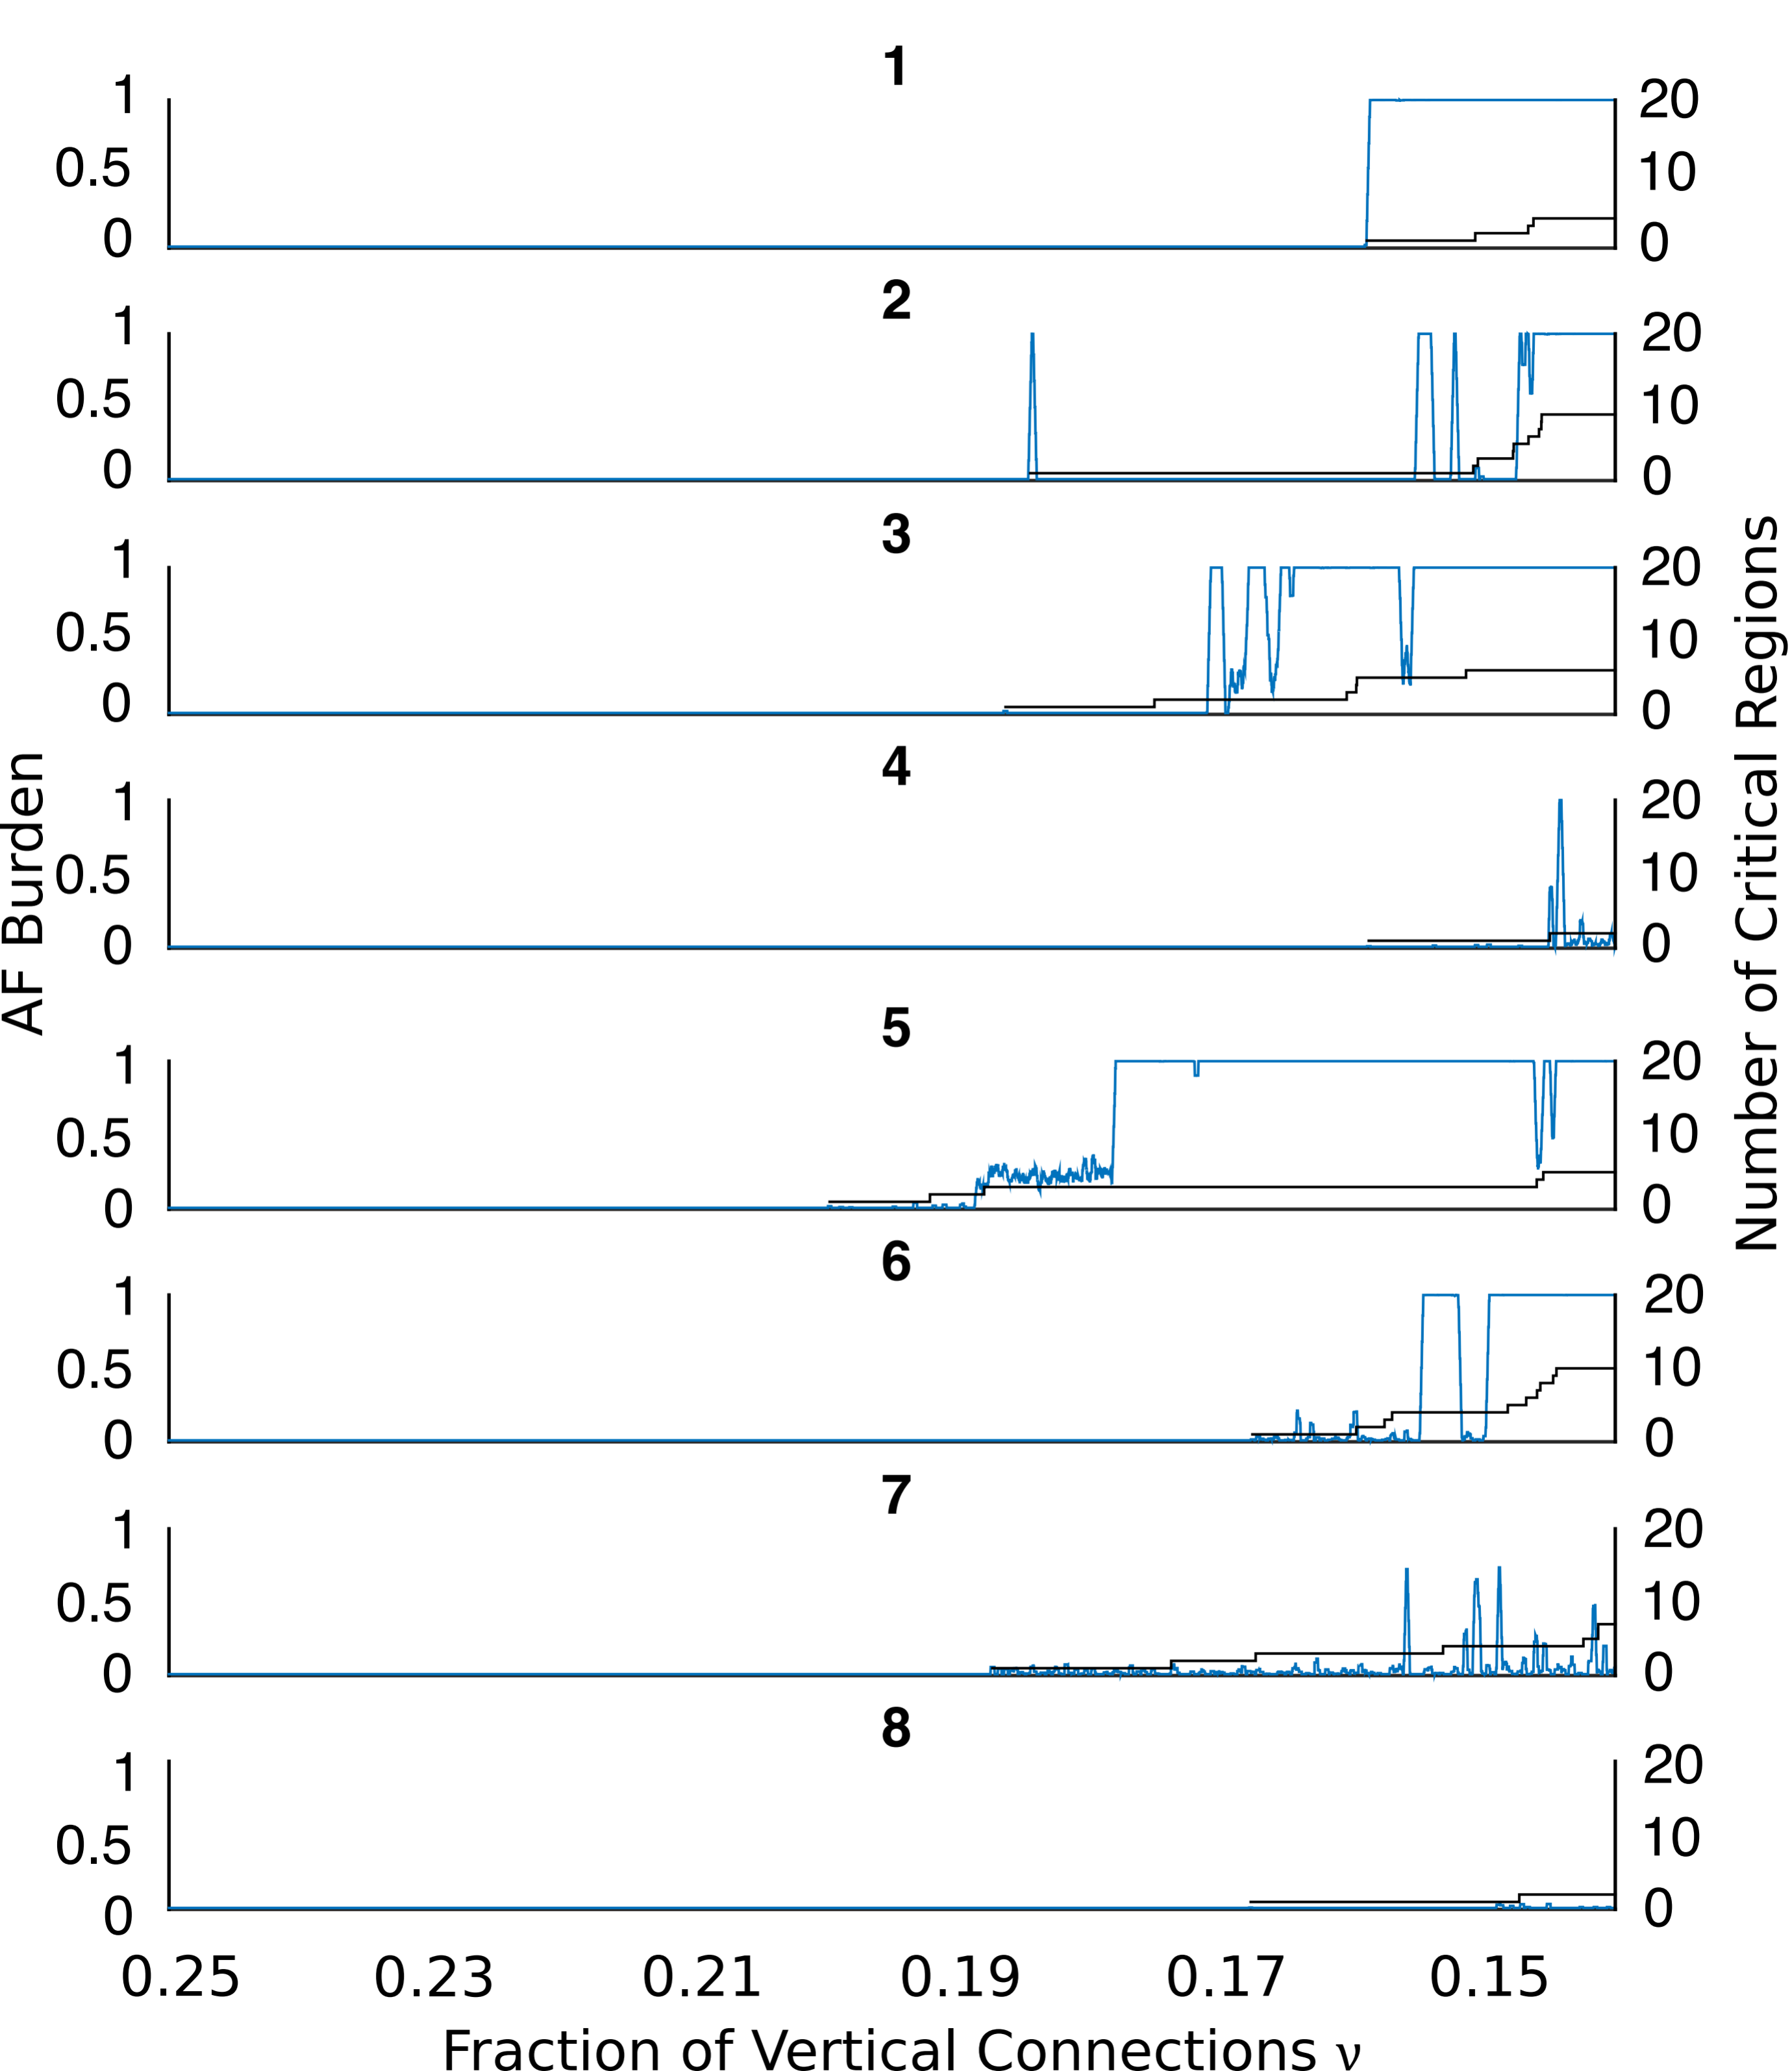

Supplement: NIHMS70146-supplement-Appendix_Figure_1.pdf [file NIHMS70146-supplement-Appendix_Figure_1.pdf]
